# Supplementary material
Source: Springer Nature journal article supplement (https://www.springermedizin.de/resource/supplementary/12968_2010_977_MOESM1_ESM.pdf/9580082)

**A**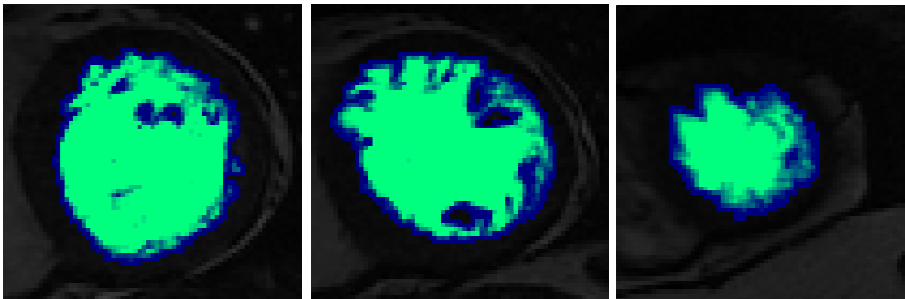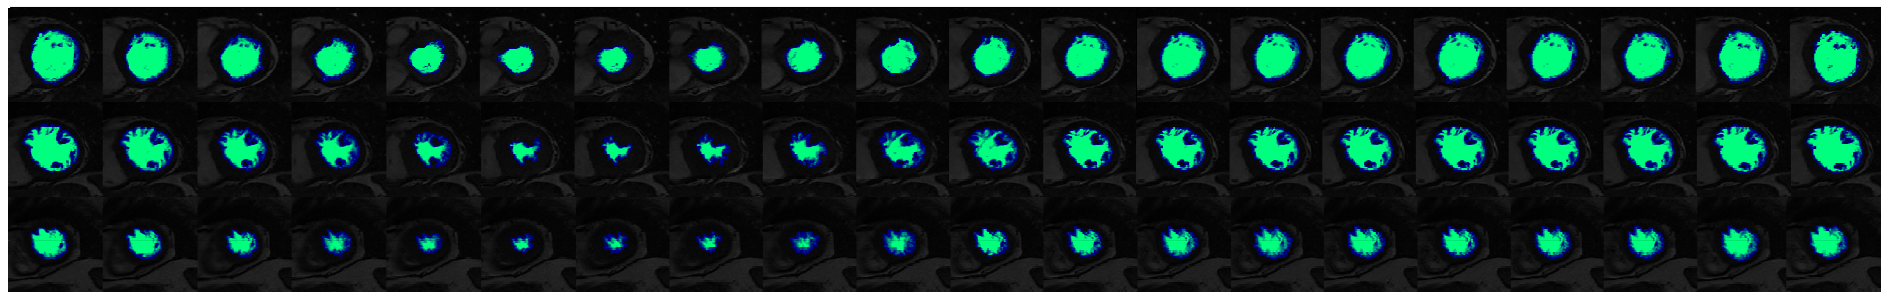**B**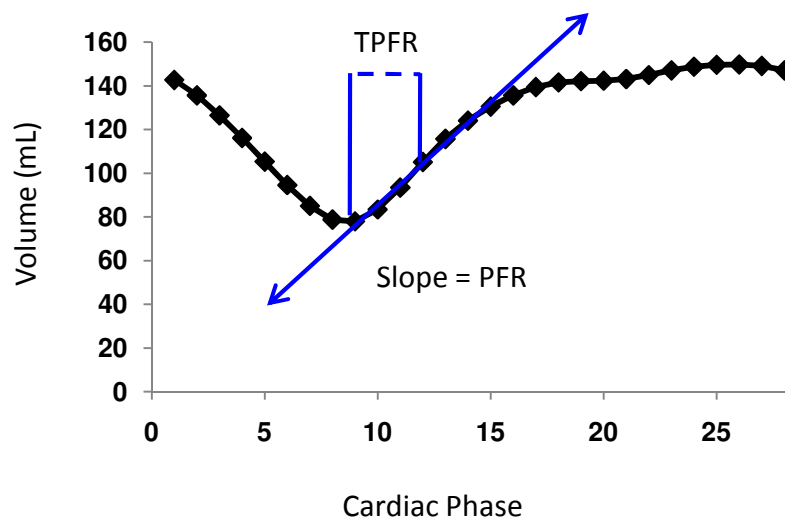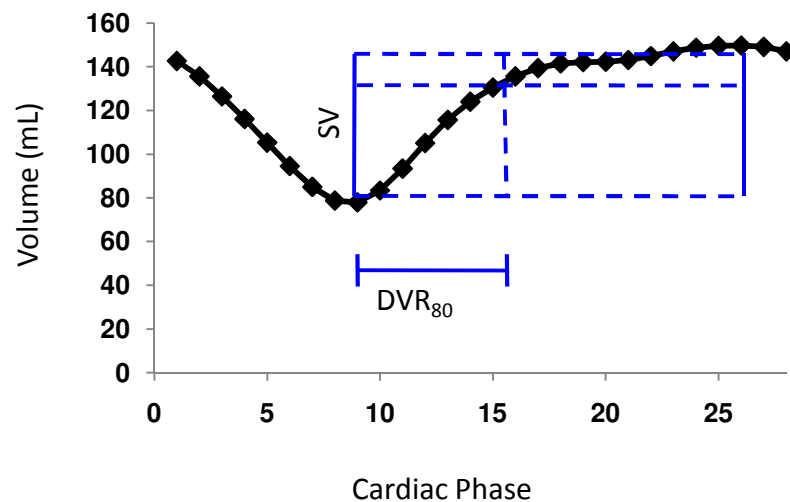

Supplement: MOESM1 [file 9580082]
